# Supplementary figures and images for: Prognostic alternative mRNA splicing signatures and associated splicing factors in acute myeloid leukemia
Source: PubMed Central journal article supplement — Neoplasia. 2020 Jul 9;22(9):447–57. doi: 10.1016/j.neo.2020.06.004 (PMC7356271; doi:10.1016/j.neo.2020.06.004), 2020-07-09

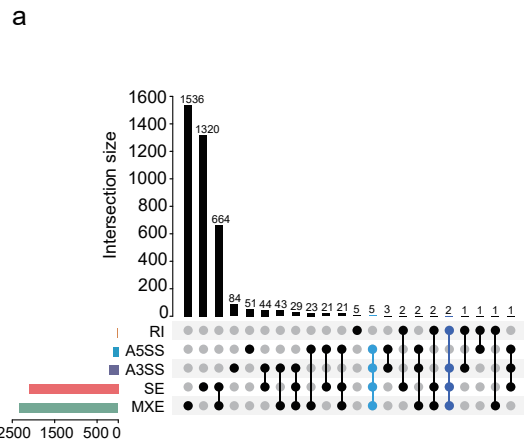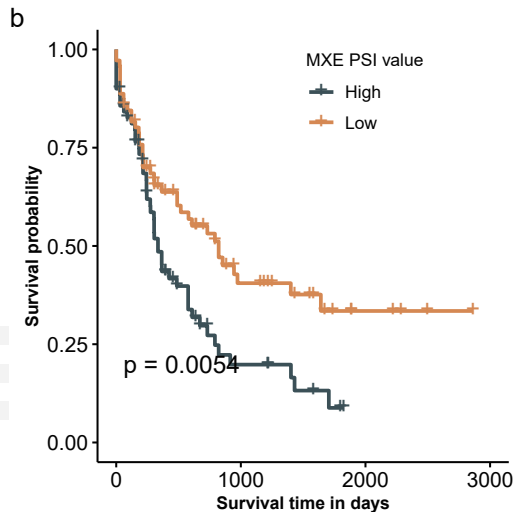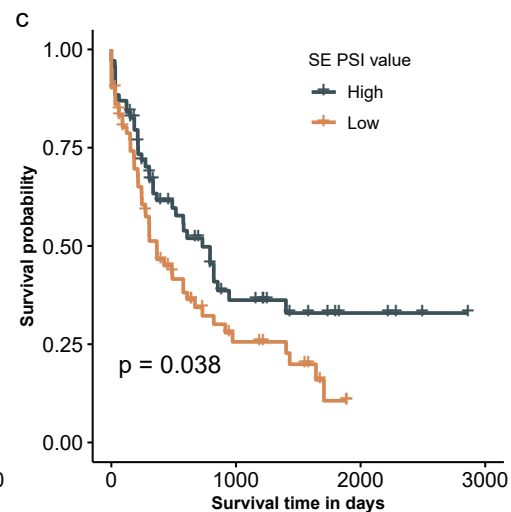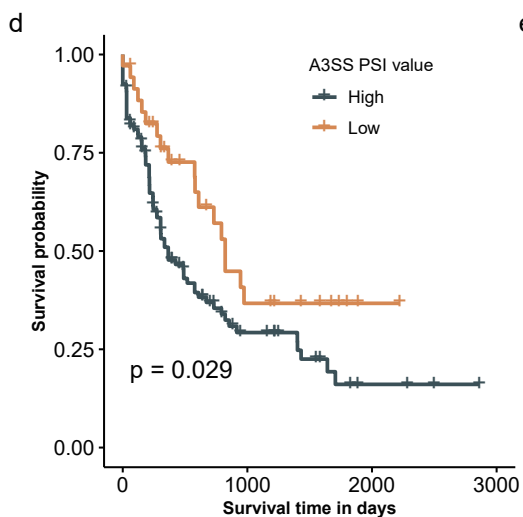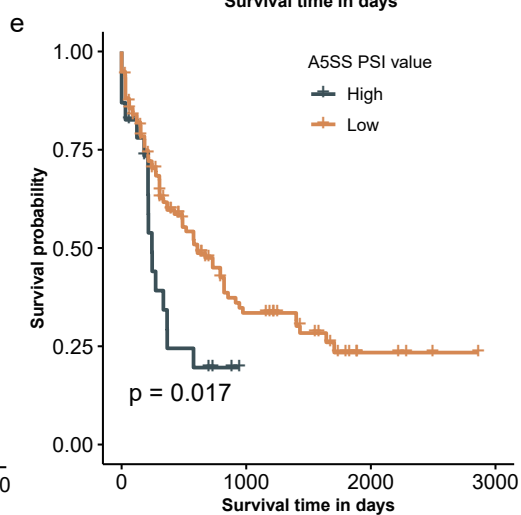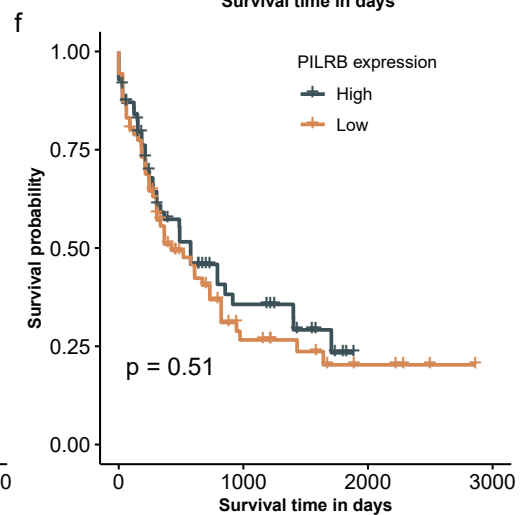

Supplement: mmc1.pdf [file mmc1.pdf]

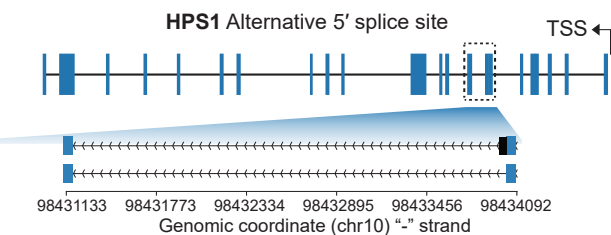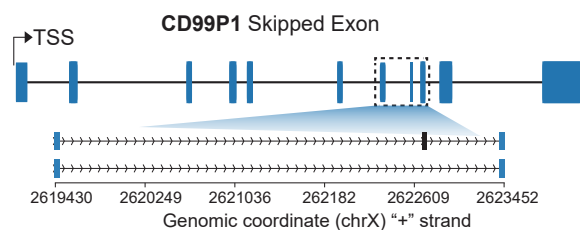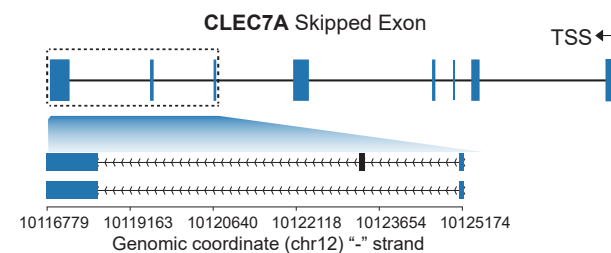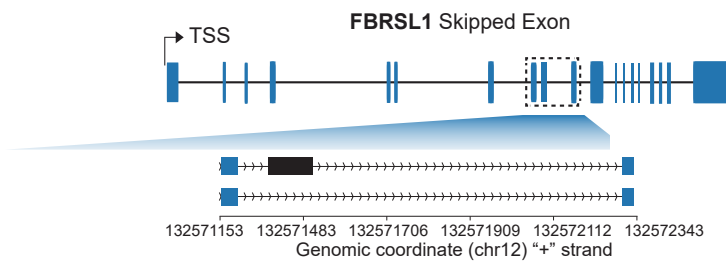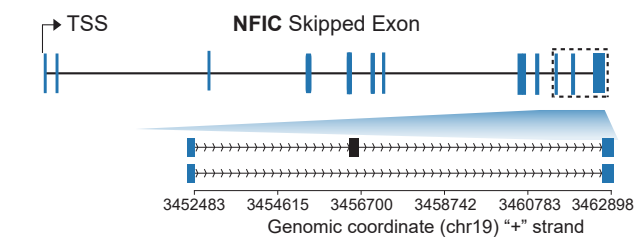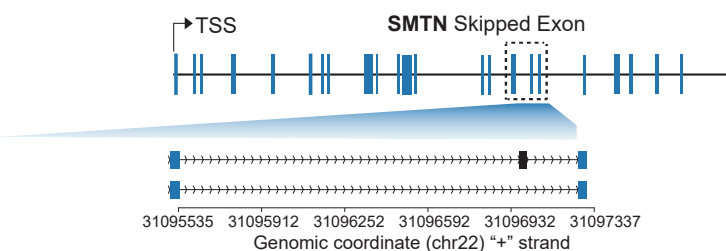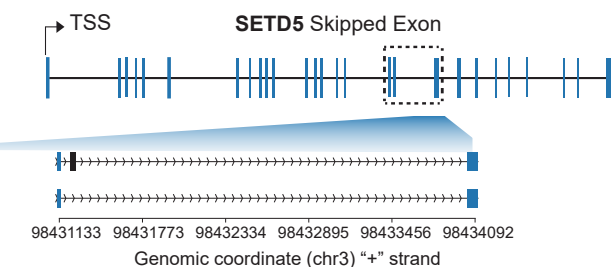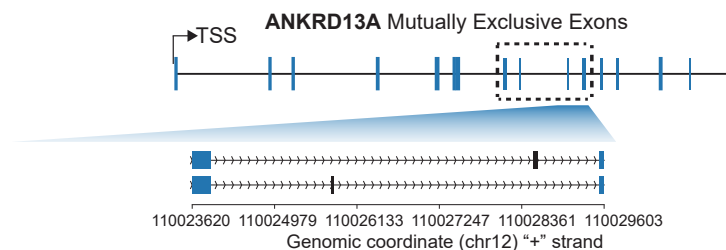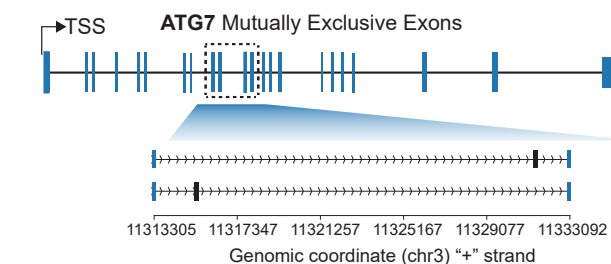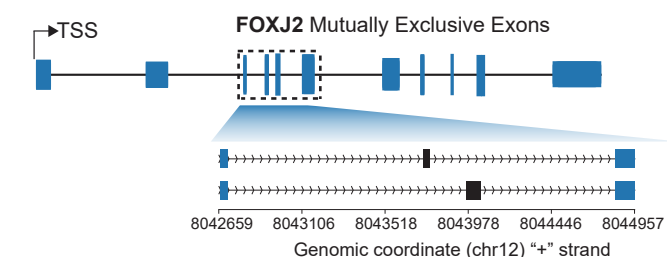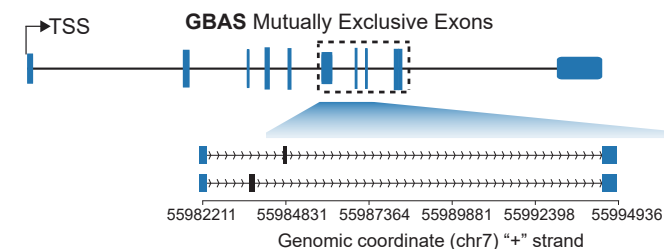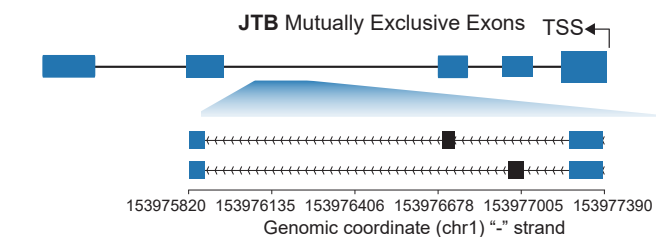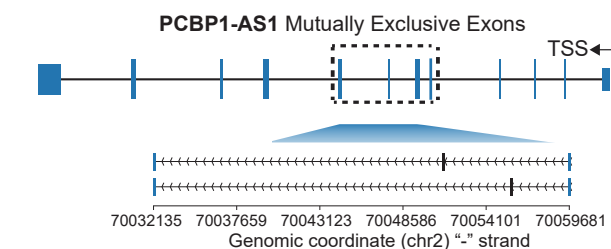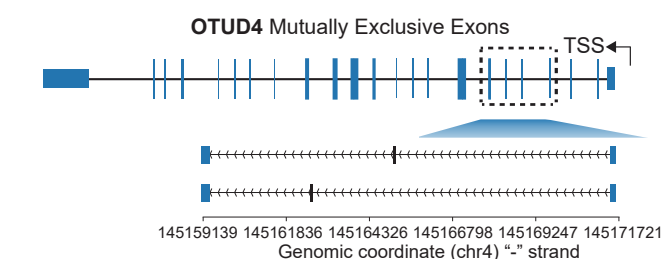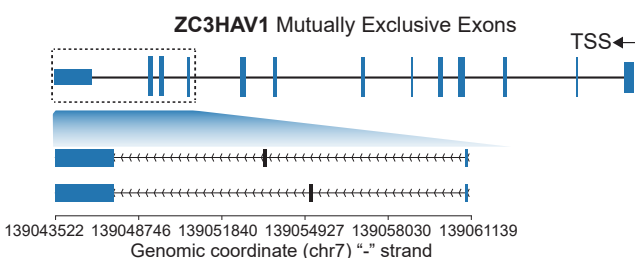

Supplement: mmc2.pdf [file mmc2.pdf]

Cytogenetic risk: Favorable

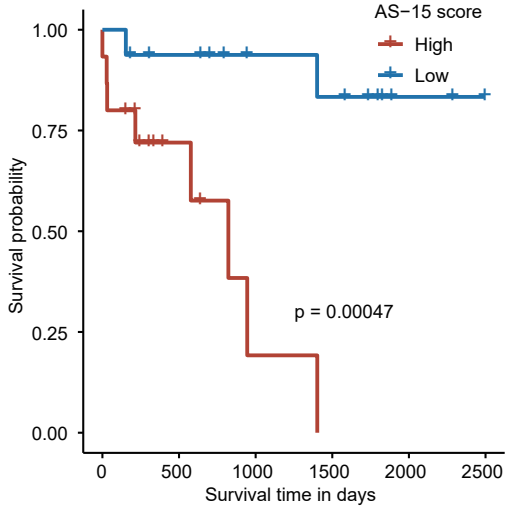

Cytogenetic risk: intermediate

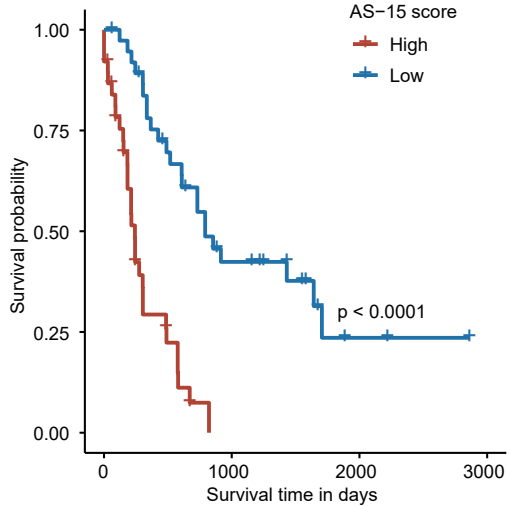

Cytogenetic risk: Adverse

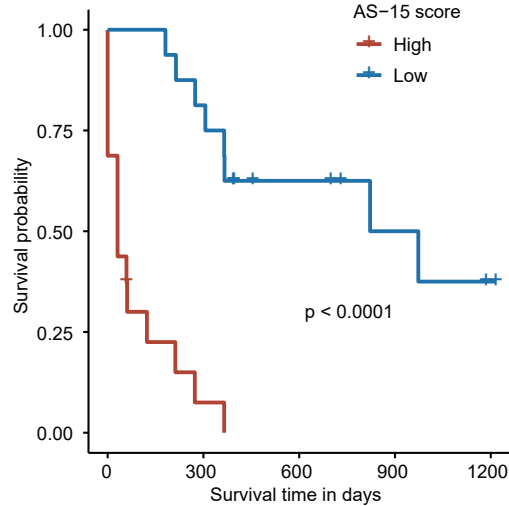

Supplement: mmc3.pdf [file mmc3.pdf]

## Training set

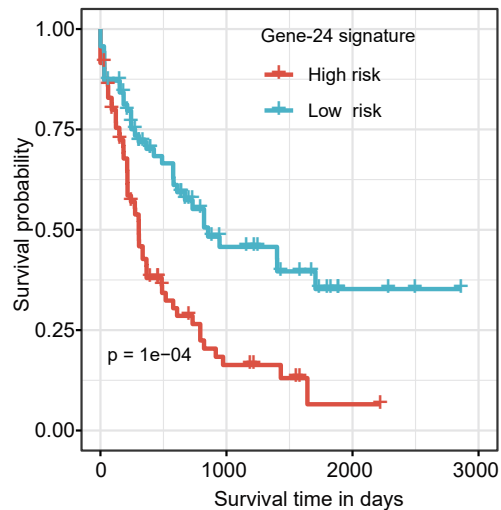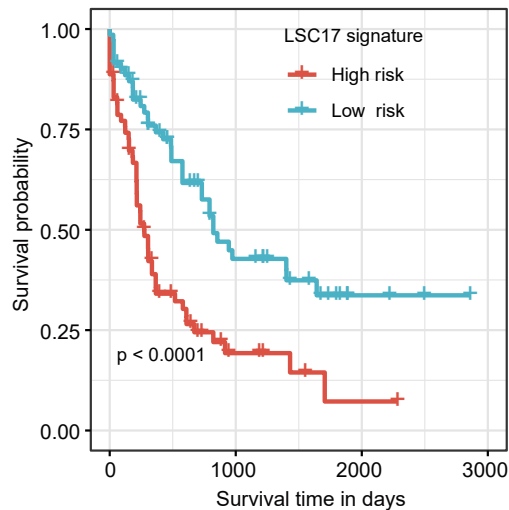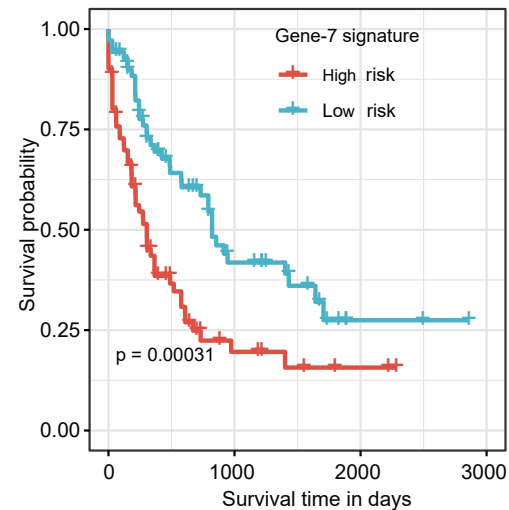

## Validation set

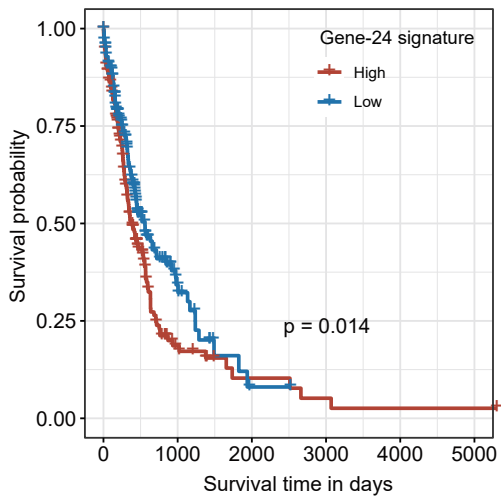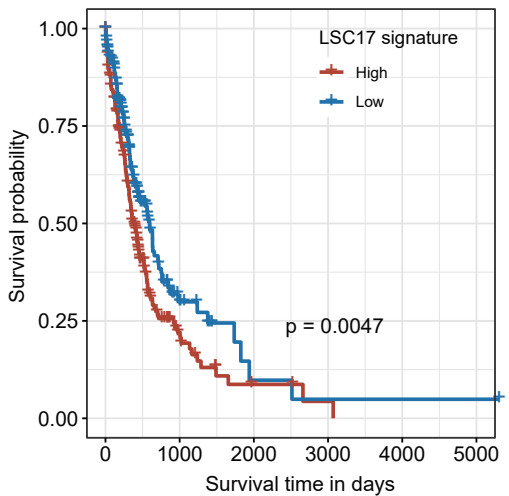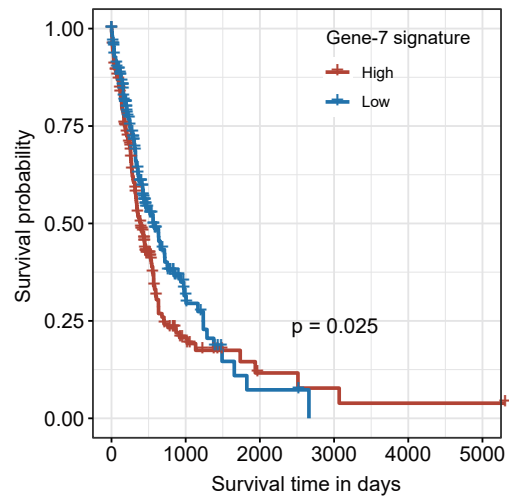

Supplement: mmc4.pdf [file mmc4.pdf]

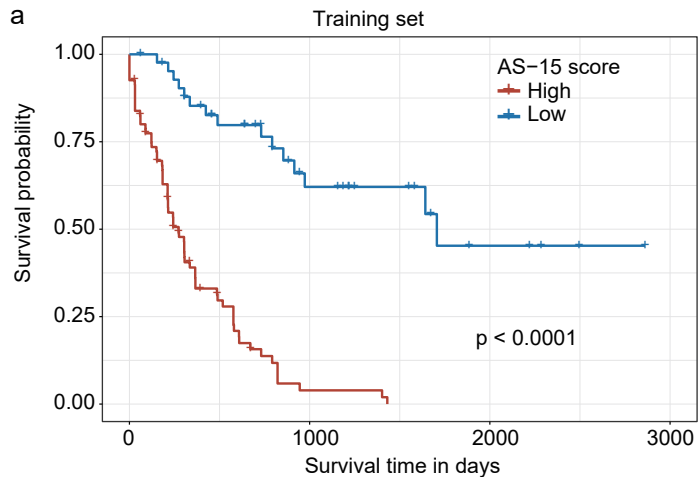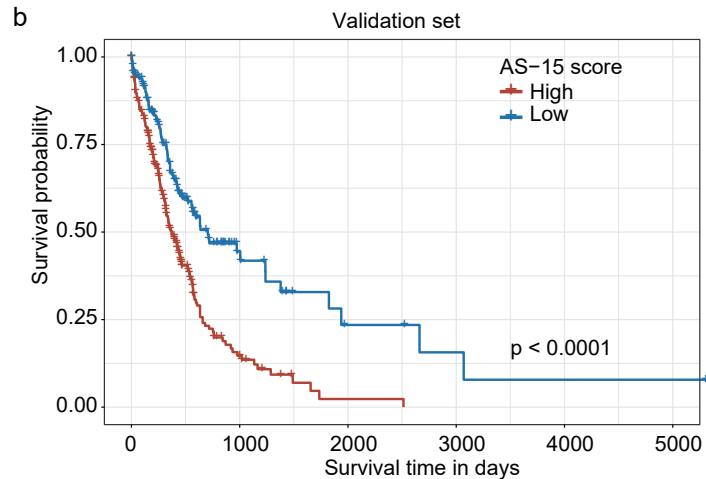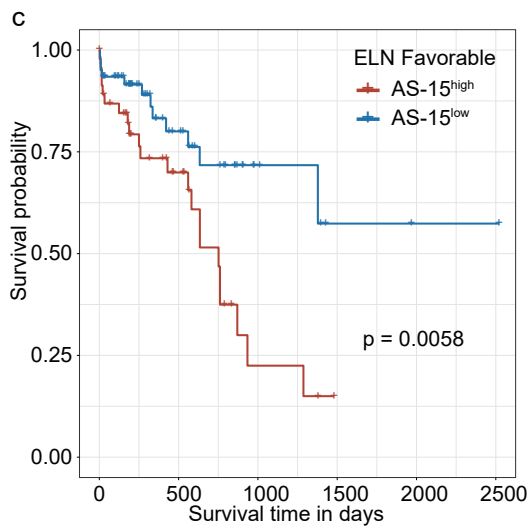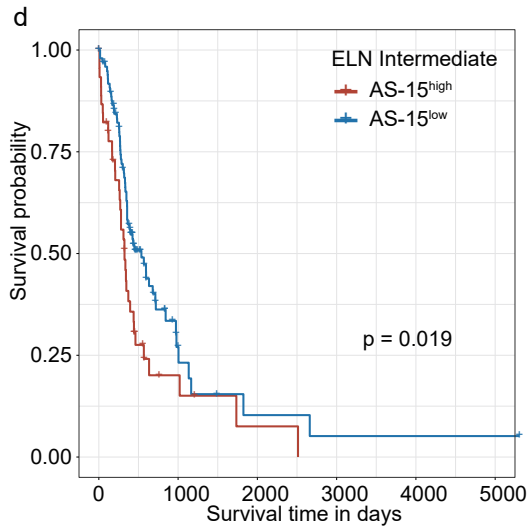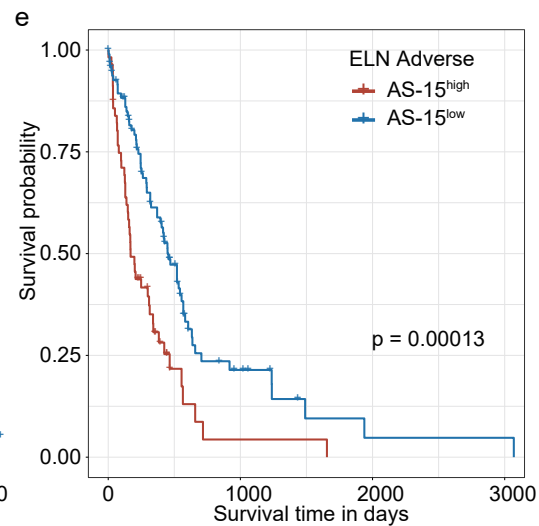

Supplement: mmc5.pdf [file mmc5.pdf]

**a**

Required for cell line

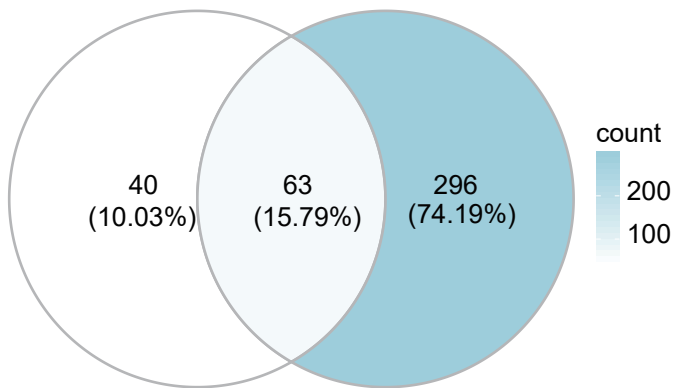

Differentially expressed in AML

**b**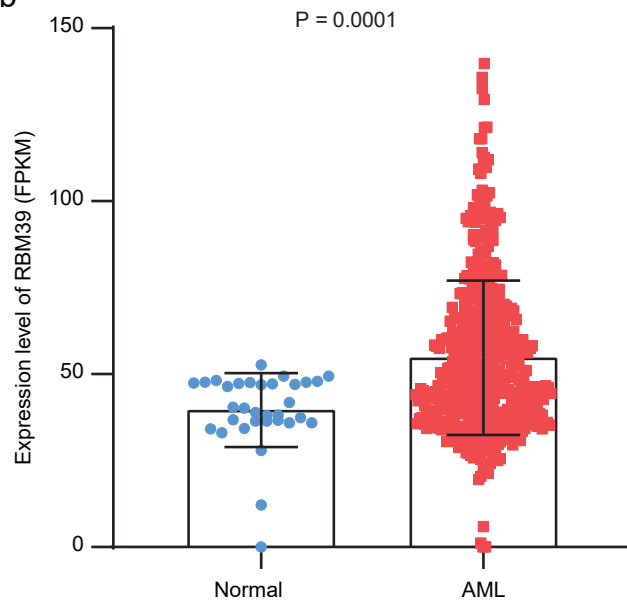**c**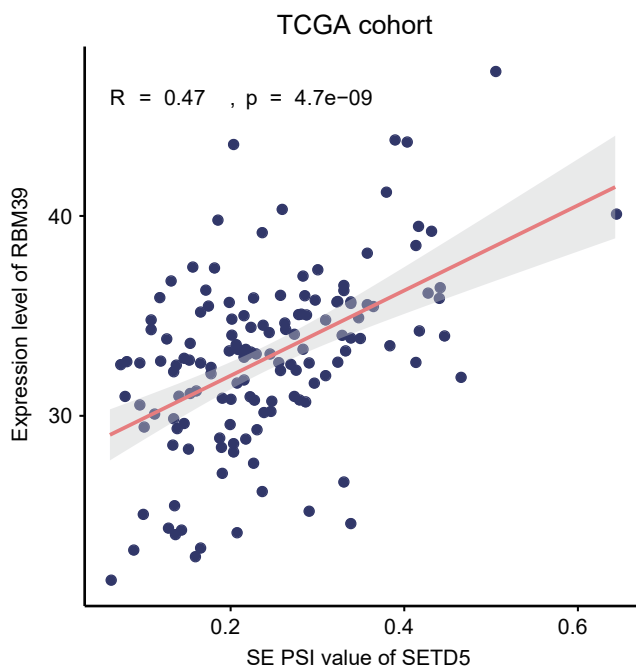**d**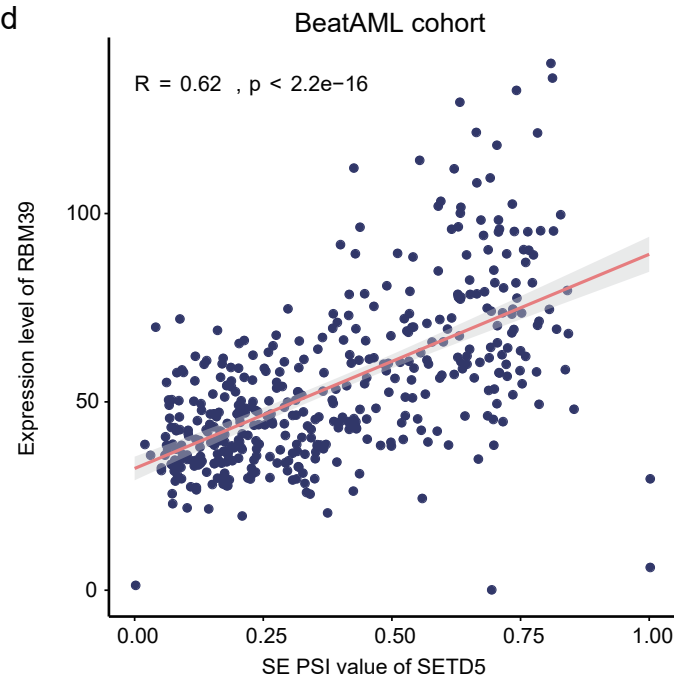

Supplement: mmc6.pdf [file mmc6.pdf]
